# Supplementary material
Source: Springer Nature journal article supplement (https://www.springermedizin.de/resource/supplementary/13014_2013_980_MOESM3_ESM.pdf/9634578)

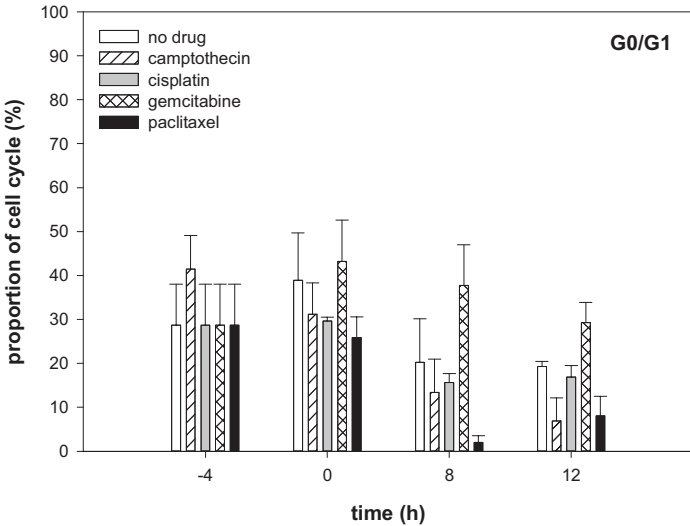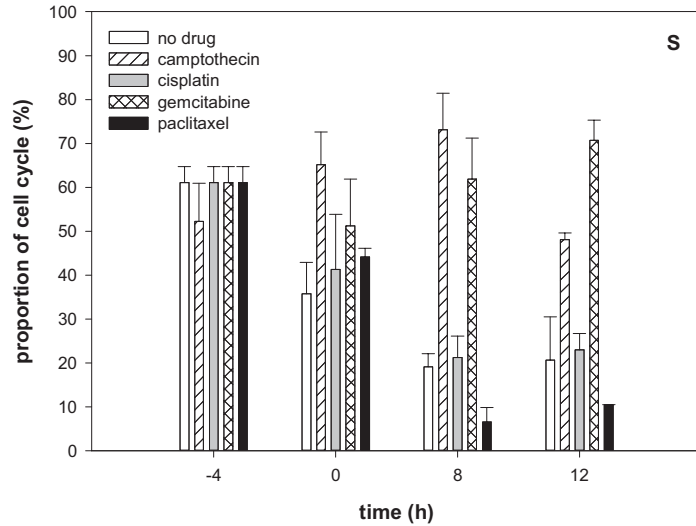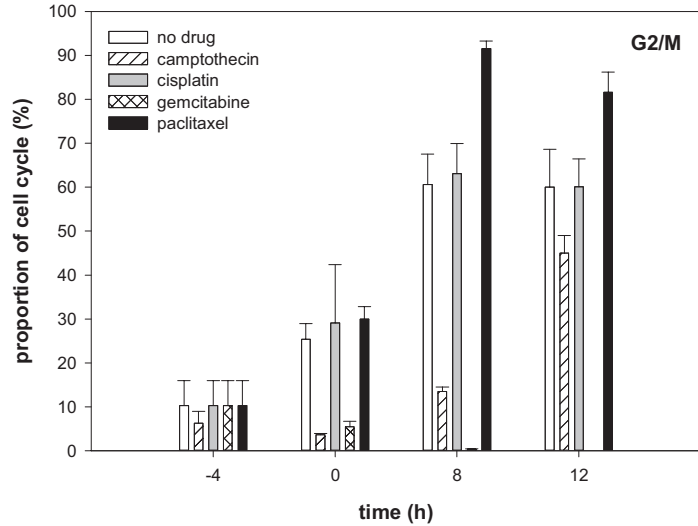

Supplement: MOESM3 [file 9634578]
